# Supplementary material
Source: PubMed Central journal article supplement (PMC8940858)
Supplement: mmc1-suppl.pdf [file mmc1-suppl.pdf]

# Supplementary Material

## **Development of a high-throughput screening assay to identify inhibitors of the SARS-CoV-2 guanine-N7 methyltransferase using RapidFire mass spectrometry**

Lesley-Anne Pearson,<sup>a</sup> Charlotte J. Green,<sup>a</sup> De Lin,<sup>a</sup> Alain-Pierre Petit,<sup>a</sup> David W. Gray,<sup>a\*</sup> Victoria H. Cowling,<sup>b</sup> Euan A. F. Fordyce<sup>a\*</sup>

a. Drug Discovery Unit, School of Life Sciences, University of Dundee, Dundee, DD1 5EH, United Kingdom

b. Centre for Gene Regulation and Expression, School of Life Sciences, University of Dundee, Dundee, DD1 5EH, United Kingdom

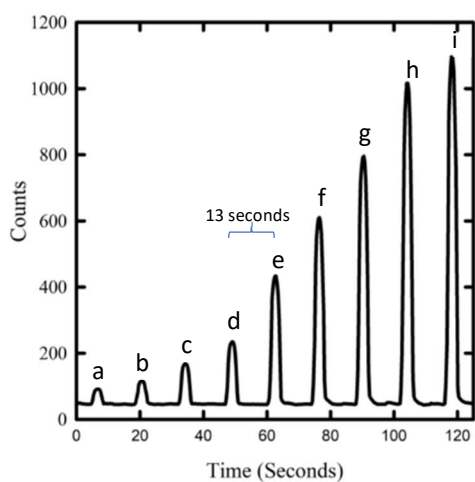

Supplemental Figure 1:  
Representative chromatogram for RF-MS/MS (MRM transition 385.1/134) of SAH formation in the reaction of 5 nM nsp14, 1  $\mu$ M SAM and 0.7  $\mu$ M cap at various time points. (a) 0 min; (b) 2 min; (c) 5 min; (d) 10 min; (e) 20 min; (f) 30 min; (g) 45 min; (h) 60 min; (i) 90 min. The injection cycle time is 13 seconds.

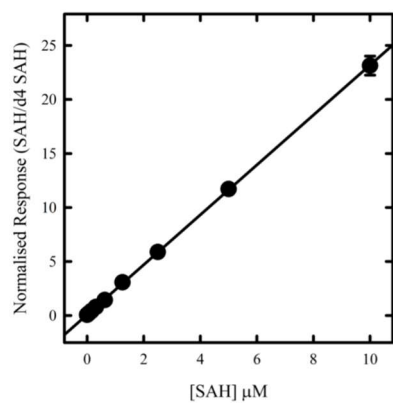

Supplemental Figure 2:

Representative calibration curve (standard curve) for SAH by RF-MS/MS. SAH was spiked at 0.017 – 10  $\mu\text{M}$  in a background of assay buffer and quenching solution containing 0.08  $\mu\text{M}$  internal standard (d4 SAH) and measured by RF-MS/MS. Values plotted are mean  $\pm$  standard deviation (n=4)

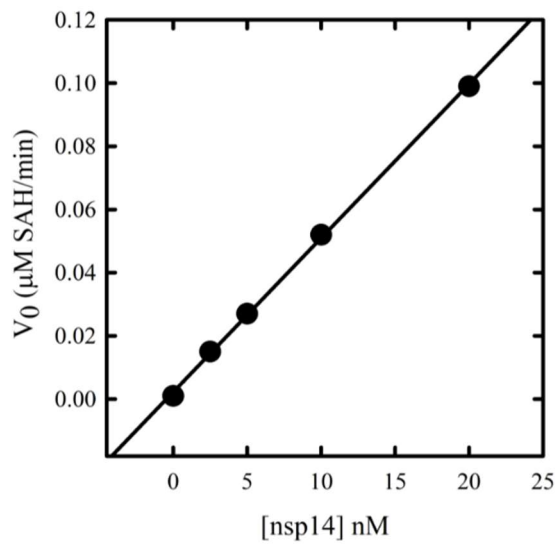

Supplemental Figure 3:  
Plot of initial velocity against  
nsp14 concentration. Initial  
velocity determined up to 30  
minutes.

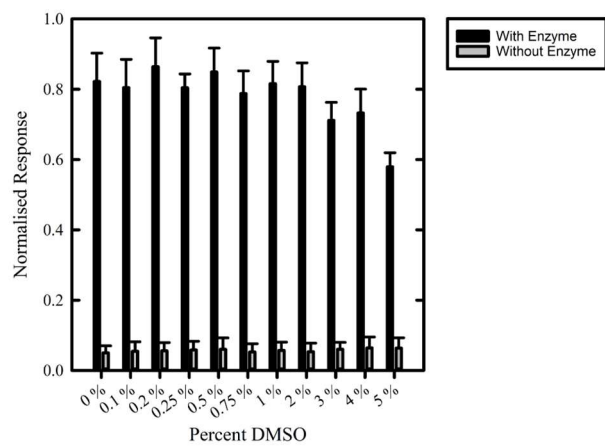

Supplemental Figure 4:  
 Determination of nsp14 sensitivity to DMSO. Nsp14, cap and SAM tested at identified screening concentrations (5 nM, 0.7  $\mu$ M and 1  $\mu$ M respectively) for 60 minutes.

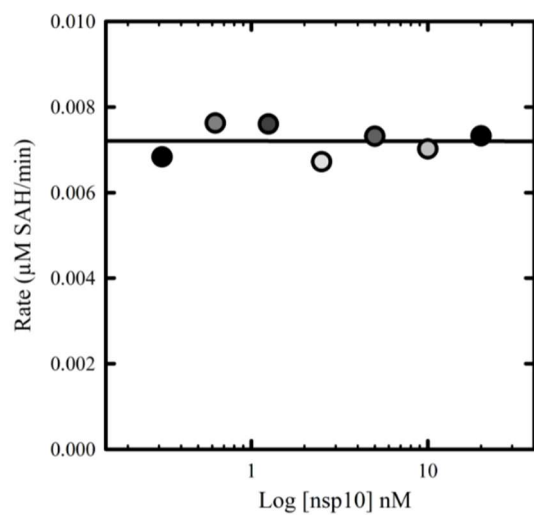

Supplemental Figure 5

Determination of effect of increasing nsp10 concentrations on reaction rate. Nsp10 titrated from a top concentration of 20 nM with identified screening concentrations of all other assay components. Rates determined from reaction progress curves.

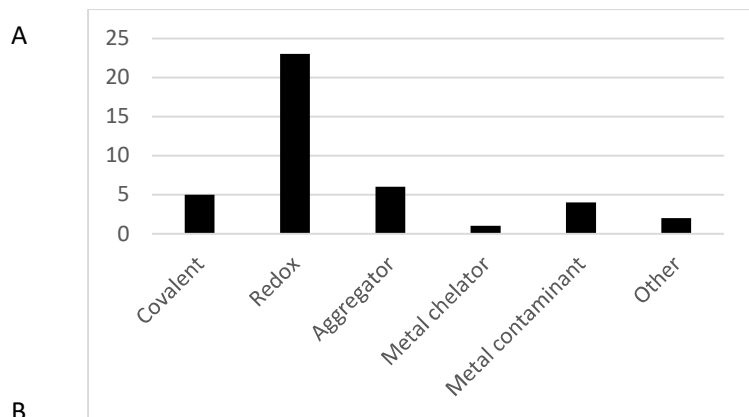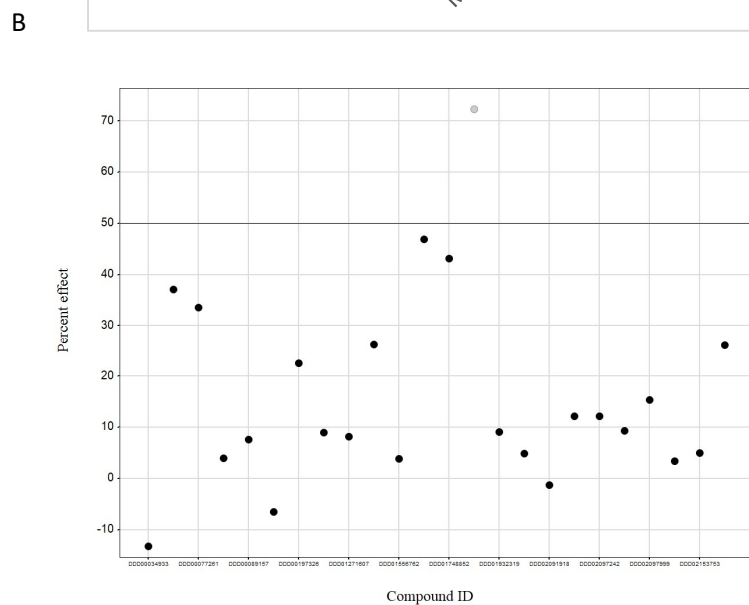

Supplemental Figure 6:  
 A) Breakdown on the number of compounds for each assay interference mechanism and B) Plot of results from interference set testing. Cut off was set at 50 % (grey line).

| Name                 | Structure                                                                            | SARS-CoV-2 nsp14 IC <sub>50</sub> (n = 2) |
|----------------------|--------------------------------------------------------------------------------------|-------------------------------------------|
| Balsalazide          | 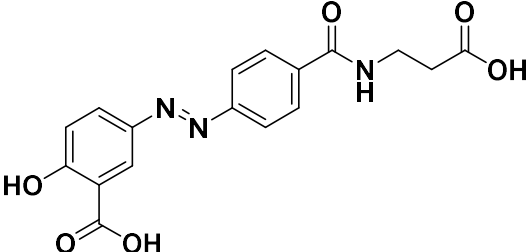   | 22.8 - >100 μM                            |
| Bendamustine         |    | 26.6 - 40.1 μM                            |
| Diacerein            |    | 40.7 - 80.4 μM                            |
| 3'-hydroxykaempferol |  | 16.9 - 22.8 μM                            |
| Kaempferol           |  | 22.4 - 28.5 μM                            |
| Omipalisib           |  | 5.5 - 55.0 μM                             |



|                  |                                                                                    |                           |
|------------------|------------------------------------------------------------------------------------|---------------------------|
| Phenoxybenzamine | 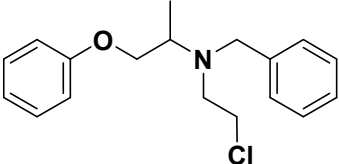 | 58.2 - 91.0 $\mu\text{M}$ |
| Prasugrel        |  | 25.8 - 36.6 $\mu\text{M}$ |

Supplemental Table 1:  
Names, structures and nsp14  $\text{IC}_{50}$  for statistically significant hits
